# Supplementary material
Source: PubMed Central journal article supplement (PMC4209367)
Supplement: 97320630010580S1.pdf [file 97320630010580S1.pdf]

## Supplementary material:

**Table 1:** Table showing the amino acids involved in hydrogen bond interaction with the investigating ligands

| No  | Ligand      | Rule of 5 No.Of Violations | Torsions | $\Delta G$ (Kcal/Mol) | $K_d$ ( $\mu M$ ) | Amino Acids Involved In Hydrogen Bond Interaction | H -Bond Length ( $\text{\AA}$ ) |
|-----|-------------|----------------------------|----------|-----------------------|-------------------|---------------------------------------------------|---------------------------------|
| 01. | Cyanidin    | 0                          | 6        | -6.73                 | 12.0              | Cyanidin::FRA1:H                                  | 1.91                            |
| 02. | Chrysin     | 0                          | 3        | -6.56                 | 273.8             | KSR:A:LYS365:HZ2<br>Chrysin:FRA1:H                | 2.098<br>2.109                  |
| 03. | Apigenin    | 0                          | 4        | -6.08                 | 35.04             | Apigenin::FRA1:H1                                 | 2.03                            |
| 04. | Delphinidin | 0                          | 6        | -5.74                 | 15.66             | Delphinidin::FRA1:H1<br>Delphinidin::FRA1:H1      | 1.83<br>2.07                    |
| 05. | Acacetin    | 0                          | 4        | -5.69                 | 67.92             | Acacetin::FRA1:H                                  | 2.04                            |
| 06. | Taxifolin   | 0                          | 6        | -4.86                 | 61.58             | Taxifolin::FRA1:H1<br>KSR:A:ASN368:HD21 1         | 2.09<br>1.95                    |
